# Supplementary material for: HAPpEN: A pragmatic general practitioner-centered obesity management trial in rural Germany integrating multimodal lifestyle interventions
Source: Research Square preprint supplement (doi:10.21203/rs.3.rs-6540216/v1), 2025-05-16
Supplement: Supplementary file 1 [file 773155b9b66a37603a3228b2.docx]

**HAPpEN: A pragmatic general practitioner-centered obesity management trial in rural Germany integrating multimodal lifestyle interventions**

Supplementary material

Supplementary Table 1: Overview of inclusion and exclusion criteria for the HAPpEN pragmatic trial.

| Inclusion criteria | Exclusion criteria |
| --- | --- |
| - Age between 18 and 65 - Body mass index (BMI) ≥ 30 at the time of recruitment - Sufficient German language knowledge - Ability and willingness to use digital, app-based self-monitoring diary | - Condition of incapacity for load bearing, e.g., following a surgical procedure - Patients requiring urgent major surgical intervention - Patients with seizure disorders or epilepsy - Dementia/cognitive deficit, which contradicted with the program - Psychiatric illness contradicting the program - Participation in another study (up to one month before start timepoint) - Heart failure from New York Hear Association class III onwards - Uncontrolled arterial hypertension - Severe pulmonary comorbidity (severe asthma, chronic obstructive pulmonary disease, modified Medical Research Council dyspnoea scale >2 / chronic obstructive pulmonary disease assessment test >10, pulmonary fibrosis) - Severe psychiatric eating disorders - Other severe illness that rendered physical exertion impossible |

Supplementary Table 2: Overview of demographic and health characteristics of baseline, final population and dropouts.

|  | **Baseline Population** (n) (1). | **Final Population** (n)  (Complete Cases) | **Dropouts** (n) | p-value | Pearson-Chi squared test | df | n  (T12/ dropouts) |
| --- | --- | --- | --- | --- | --- | --- | --- |
| **sex** (%) |  |  |  |  |  |  |  |
| female | 74.1 (63) | 69.6 (39) | 82.8 (24) | 0.191 | 1.71 | 1 | 56/29 |
| male | 25.9 (22) | 30.4 (17) | 17.2 (5) |
| **Age** (years) | 46.9 ± 11.8 (83) | 47.6 ± 11.9 (56) | 45.5 ± 11.7 (27) | 0.447 |  |  | 56/27 |
| **Marital Status** (%)  Single, living alone  Single, living with a partner  Married, living with spouse  Married, living separately  Divorced  Widowed | 13.1 (11)  14.3 (12)  64.3 (54)  1.2 (1)  6.0 (5)  1.2 (1) | 10.7 (6)  14.3 (8)  67.9 (38)  1.8 (1)  3.6 (2)  1.8 (1) | 17.9 (5)  14.3 (4)  57.1 (16)  0.0 (0)  10.7 (3)  0.0 (0) | 0. 599 | 3. 66 | 5 | 56/28 |
| **Education** (%)  No formal qualification  Basic education  Secondary education  High school diploma | 1.2 (1)  35.3 (30)  43.5 (37)  20.0 (17) | 1.8 (1)  37.5 (21)  41.1 (23)  19.6 (11) | 0.0 (0)  31.0 (9)  48.3 (14)  20.7 (6) | 0.806 | 0.98 | 3 | 56/29 |
| **Vocational Training** (%)  No qualification  Apprenticeship/vocational training  Technician/Master’s/Further education  University of Applied Sciences/  University degree | 6.1 (5)  62.2 (51)  23.2 (19)  8.5 (7) | 7.3 (4)  63.6 (35)  23.6 (13)  5.5 (3) | 3.7 (1)  59.3 (16)  22.2 (6)  14.8 (4) | 0. 511 | 2. 31 | 3 | 55/27 |
| **Employment Status** (%)  Retired  Unemployed  Employed  Student | 9.5 (8)  6.0 (5)  83.3 (70)  1.2 (1) | 10.9 (6)  5.5 (3)  81.8 (45)  1.8 (1) | 6.9 (2)  6.9 (2)  86.2 (25)  0.0 (0) | 0.811 | 0.96 | 3 | 55/29 |
| **Working Hours** (h/week) | 32.5 ± 10.4 (75) | 32.7 ± 10.1 (50) | 32.2 ± 11.2 (25) | 0. 804 |  |  | 50/25 |
| Shift Work (%) | 14.5 (11) | 15.4 (8) | 12.5 (3) | 0.740 | 0.11 | 1 | 52/24 |
| **Years Spent on Weight Reduction** (%)  10 years  5-9 years  2-4 years  < 2 years | 67.1 (55)  18.3 (15)  7.3 (6)  7.3 (6) | 65.5 (36)  20.0 (11)  7.3 (4)  7.3 (4) | 70.4 (19)  14.8 (4)  7.4 (2)  7.4 (2) | 0.954 | 0.33 | 3 | 55/27 |

Data are shown for baseline population (n = 98), final participants (n = 61) and dropouts (n = 37). Demographic characteristics are represented by sex, age, marital status, education, vocational training, employment status and working hours. Weight reduction is considered as health characteristic. For statistical analysis of age and working hours of the final population vs. dropouts a t-test was applied, while the remaining characteristics were analyzed using the Pearson-Chi-squared test.

Supplementary Table 3: Documented long-term diagnosis with ICD10 codes of trial participants.

| **ICD10** | **Diagnosis** | **Baseline Population T0 % (n)** | **Final Population T12 % (n)** |
| --- | --- | --- | --- |
| E10 | Type 1 Diabetes Mellitus | 1.1 (1) | 0.0 (0) |
| E11 | Type 2 Diabetes Mellitus | 19.1 (18) | 22.0 (13) |
| R73.0 | Latent Diabetes Mellitus | 12.8 (12) | 15.3 (9) |
| E03 | Other Hypothyroidism | 8.5 (8) | 10.2 (6) |
| E04 | Diffuse Goiter | 19.1 (18) | 23.7 (14) |
| E06.3 | Hashimoto’s Thyroiditis | 5.3 (5) | 5.1 (3) |
| E78 | Dyslipidemia | 21.3 (20) | 28.8 (17) |
| E88.2 | Lipedema, Lipomatosis | 2.1 (2) | 1.7 (1) |
| E25 | Cushing’s Syndrome | 1.1 (1) | 1.7 (1) |
| E79 | Asymptomatic Hyperuricemia | 11.7 (11) | 15.3 (9) |
| M10 | Gout | 1.1 (1) | 1.7 (1) |
| G47 | Sleep Disorders | 1.1 (1) | 1.7 (1) |
| G47.31 | Obstructive Sleep Apnea Syndrome | 3.2 (3) | 5.1 (3) |
| I10 | Hypertension | 59.6 (56) | 64.4 (38) |
| ZF I21 + I25 | Ischemic Heart Disease | 3.2 (3) | 3.4 (2) |
| ZF I34 + I35 | Heart Valve Disorders | 1.1 (1) | 1.7 (1) |
| ZF I47.1 + I48 + I49 | Cardiac Arrhythmias | 5.3 (5) | 8.5(5) |
| I45.1 | Right Bundle Branch Block | 1.1 (1) | 0.0 (0) |
| I50 | Cardiac insufficiency | 1.1 (1) | 1.7 (1) |
| I70 | Atherosclerosis | 1.1 (1) | 1.7 (1) |
| I71 | Aortic aneurysm | 1.1 (1) | 1.7 (1) |
| I89.0 | Lymphedema | 6.4 86) | 5.1 (3) |
| ZF I83 + I87.2 | Venous insufficiency | 25.5 (24) | 30.5 (18) |
| J45 | Bronchial asthma | 6.4 (6) | 1.7 (1) |
| ZF J42 + J44 | Obstructive lung disease | 4.3 (4) | 5.1 (3) |
| ZF K21 + K22.7 | Reflux | 10.6 (10) | 15.3 (9) |
| ZF K57 + K58 | Diverticula/irritable bowel syndrome | 6.4 (6.4) | 8.5 (5) |
| K76.0 | Fatty liver | 10.6 (10) | 15.3 (9) |
| ZF K80 + K81 | Gallbladder Disorders | 4.3 (4) | 3.4 (2) |
| F32 | Depressive Episode | 11.7 (11) | 10.2 (6) |
| F41 | Anxiety Disorder | 3.2 (3) | 1.7 (1) |
| F48.0 | Burnout Syndrome | 1.1 (1) | 0.0 (0) |
| R52.2 | Chronic Pain Syndrome | 1.1 (1) | 0.0 (0) |
| R61 | Hyperhidrosis | 1.1 (1) | 1.7 (1) |
| ZF R32 + N32.8 + N39.42 | Incontinence Issues | 6.4 (6) | 6.8 (4) |
| L40.- | Psoriasis | 7.4 (7) | 5.1 (3) |
| ZF L20 + L20.8 | Atopic Disorders | 6.4 (6) | 6.8 (4) |
| C50 | Malignant Neoplasm of Breast | 6.4 (6) | 8.5 (5) |
| D35.2 | Pituitary Adenoma | 1.1 (1) | 0.0 (0) |
| M15 | Polyarthritis | 1.1 (1) | 0.0 (0) |
| M16 | Coxarthrosis | 7.4 (7) | 10.2 (6) |
| M17 | Gonarthrosis | 12.8 (12) | 15.3 (9) |
| M18 | Rhizarthrosi | 2.1 (2) | 1.7 (1) |
| M47 | Degenerative Spinal Disease, Spondylosis | 10.6 (10) | 13.6 (8) |
| ZF M48 + M49.29 | Spinal Canal Stenosis | 9.6 (9) | 11.9 (7) |
| M49.29 | Chondrocalcinosis | 2.1 (2) | 3.4 (2) |
| M51.2 | Disc Protrusion | 10.6 (10) | 11.9 (7) |
| ZF M54 | Back Pain, Including Radiculopathy and Lumbago | 17.0 (16) | 18.6 (11) |
| M79.9 | Fibromyalgia | 2.1 (2) | 3.4 (2) |

Data are shown for baseline population (T0, n = 94) and final population (T12, n = 59). Data are provided by patients’ medical records.


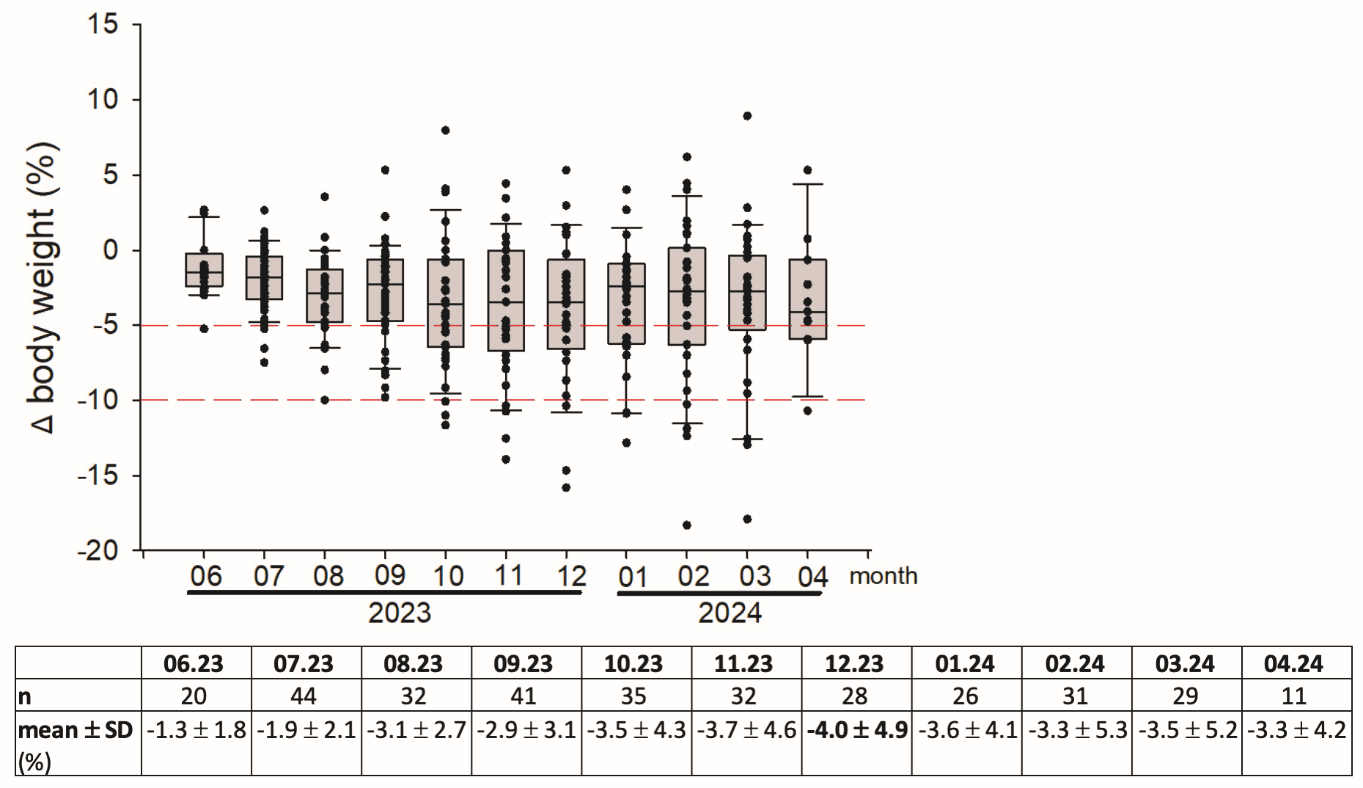


Supplementary Figure 1: Monthly individual percentage changes in body weight over time in HAPpEN participants. Data are shown as completers analysis from June 2023 (06.23) to April 2024 (04.24). The red dashed lines represent clinically significant thresholds for weight loss ≥ 5% and ≥ 10%. One dot represents one patient. The accompanying table summarizes the sample size (n), mean weight change and standard deviation (SD) for each month. A progressive trend in weight reduction is observed over the trial period, with the highest change recorded in 12.23, thereafter an increase is shown covering Christmas and New Year’s Eve, a time often associated with weight gain. SD: standard deviation

Literature Cited

1. Haderer M, Hofmann R, Bartelmeß T, König L, Betz C, Al Masri M et al. General practitioner-centered rural obesity management: Design, protocol and baseline data of the German HAPpEN pragmatic trial. Prev Med Rep 2025; 49:102959.
